# Supplementary material for: Chemically mediated rheotaxis of endangered tri-spine horseshoe crab: potential dispersing mechanism to vegetated nursery habitats along the coast
Source: PeerJ. 2022 Dec 5;10:e14465. doi: 10.7717/peerj.14465 (PMC9745956; doi:10.7717/peerj.14465)
Supplement: Data S1 [file peerj-10-14465-s001.xlsx]

## Sheet: A. marina
Concentration: 0.25 g/l										Concentration: 0.5 g/l										Concentration: 1 g/l										Concentration: 2 g/l
Conditioned water at the left arm					Conditioned water at the right arm					Conditioned water at the left arm					Conditioned water at the right arm					Conditioned water at the left arm					Conditioned water at the right arm					Conditioned water at the left arm					Conditioned water at the right arm
Experimental replicate set 1										Experimental replicate set 1										Experimental replicate set 1										Experimental replicate set 1
Individual	Time (min)	Largest distance (cm)	Displacement (cm)		Individual	Time (min)	Largest distance (cm)	Displacement (cm)		Individual	Time (min)	Largest distance (cm)	Displacement (cm)		Individual	Time (min)	Largest distance (cm)	Displacement (cm)		Individual	Time (min)	Largest distance (cm)	Displacement (cm)		Individual	Time (min)	Largest distance (cm)	Displacement (cm)		Individual	Time (min)	Largest distance (cm)	Displacement (cm)		Individual	Time (min)	Largest distance (cm)	Displacement (cm)
1	20.28	77	77		1	27.3	77	77		1	26.33	77	77		1	10.03	19	19		1	12.6	12	0		1	11.28	47	0		1	7.5	47	47		1	12.25	77	73
2	22.2	62	54		2	15.1	70	62		2	30	77	70		2	20.65	77	70		2	18.06	56	35		2	14.85	18	18		2	16.89	43	43		2	17.34	45	43
3	15.67	40	40		3	18.45	72	72		3	23.38	52	44		3	29.75	55	36		3	19.73	9	5		3	8.4	60	57		3	27.4	71	65		3	29.78	20	16
4	30	43	25		4	19.46	66	66		4	14.28	55	55		4	20.03	35	33		4	29.27	77	58		4	11.93	13	1		4	22.67	66	66		4	23	77	77
5	19.01	77	77		5	25.98	70	70		5	20.03	77	77		5	28.45	25	19		5	18.5	71	26		5	26.37	77	77		5	12.25	56	55		5	22.6	77	75
6	19.917	73	73		6	30	72	65		6	19.5	60	60		6	15	15	15		6	29.4	63	52		6	28.5	64	60		6	17.34	68	68		6	14.67	40	38
7	29.75	65	63		7	30	35	26		7	7.13	10	8		7	22.6	23	14		7	27.4	60	46		7	22.07	77	62		7	29.78	60	54		7	16.45	30	25
8	29.34	49	40		8	17.67	77	70		8	20.2	77	77		8	20.6	77	75		8	21.9	57	24		8	26.83	77	64		8	16.5	43	34		8	7.13	22	15
9	18.9	30	21		9	20.5	72	66		9	24.5	77	75		9	19.13	70	70		9	12.43	8	5		9	24.88	40	34		9	13.5	27	27		9	20.2	11	11
10	25.9	77	77		10	19.55	40	34		10	16.75	70	65		10	30	77	73		10	29.75	77	24		10	26.87	42	33		10	27.4	55	55		10	24.5	55	52
Experimental replicate set 2										Experimental replicate set 2										Experimental replicate set 2										Experimental replicate set 2
1	12.28	55	55		1	28.13	42	36		1	20	30	11		1	24.67	77	77		1	27.97	35	34		1	27.6	60	56		1	17.57	61	50		1	9.37	12	10
2	13	26	20		2	20.82	77	77		2	16.22	16	0		2	30	63	2		2	17.1	26	24		2	23.4	61	61		2	20.65	53	53		2	16.75	45	16
3	10.25	24	0		3	21.46	68	50		3	20.67	77	77		3	10.48	53	50		3	23.18	18	18		3	14.85	22	8		3	29.75	40	36		3	10.89	16	16
4	22.5	60	60		4	10.83	43	20		4	28.5	52	40		4	6.89	13	10		4	28.75	67	67		4	8.3	30	14		4	12.98	17	14		4	20.78	31	20
5	23.67	50	50		5	21.47	55	55		5	12.67	30	27		5	12.45	25	5		5	20.55	60	60		5	15.5	59	59		5	11	45	45		5	24.5	70	18
6	23	75	70		6	29.2	77	77		6	21.87	69	60		6	15.57	12	12		6	27.9	62	57		6	18.23	35	31		6	13.75	63	51		6	14.28	77	62
7	10.7	68	64		7	22.2	56	0		7	23.67	68	56		7	22.85	77	70		7	23.6	70	46		7	12.81	21	0		7	12	36	36		7	20.03	55	36
8	14.28	60	60		8	15.67	77	70		8	10.58	55	36		8	18.5	61	50		8	8.57	20	0		8	22.58	39	39		8	24.28	77	77		8	8.45	45	45
9	20.03	51	45		9	24.88	70	68		9	19.57	77	12		9	16.88	33	33		9	8.65	6	5		9	20.75	40	34		9	20.03	26	18		9	19.5	65	38
10	28.45	25	16		10	29.75	65	60		10	20.917	77	0		10	14.55	16	8		10	12.9	54	54		10	19.68	22	22		10	22.73	59	50		10	13.32	22	17
Experimental replicate set 3										Experimental replicate set 3										Experimental replicate set 3										Experimental replicate set 3
1	25.98	30	26		1	22.85	70	50		1	16.98	36	36		1	21.87	77	77		1	27.13	50	41		1	26.78	50	54		1	6.16	13	5		1	20.34	77	66
2	13.34	15	9		2	14.11	43	40		2	7.37	27	10		2	30	70	55		2	22.5	24	24		2	16.45	77	56		2	10.67	26	9		2	10.24	40	33
3	30	77	77		3	20.75	44	30		3	10.45	66	51		3	14.6	68	54		3	23.13	25	16		3	22.89	46	20		3	11.47	77	77		3	16.13	32	27
4	23.5	60	52		4	27.4	71	69		4	16.78	18	6		4	24.5	45	39		4	19.06	13	9		4	29.2	77	69		4	9.6	51	0		4	15.2	54	54
5	15	77	72		5	17.5	61	61		5	20.67	21	20		5	16.89	42	40		5	18.89	74	74		5	23.5	35	35		5	18.5	77	63		5	13.78	43	43
6	22.6	23	14		6	12.34	54	54		6	19.34	45	19		6	9.06	25	25		6	29.12	53	47		6	16.75	34	17		6	16.88	60	46		6	22.85	62	55
7	14.67	13	3		7	15	50	46		7	22.7	77	77		7	12.3	12	10		7	10.13	13	13		7	9.08	27	20		7	14.55	50	44		7	7.82	18	10
8	10.88	36	24		8	21.15	52	52		8	29.917	77	77		8	13.85	42	39		8	6.5	40	21		8	17.05	55	53		8	13.85	34	13		8	11.46	29	29
9	19.45	55	50		9	20.75	25	16		9	19.75	30	21		9	21.27	70	62		9	24.25	60	43		9	9.77	32	20		9	16.32	50	10		9	10.83	64	60
10	29.15	16	10		10	14.88	35	29		10	30	75	65		10	17.45	55	50		10	17.57	32	22		10	27.4	45	15		10	22.65	65	65		10	21.47	34	30
Note:
	Move toward vegetation cue
	Move toward control seawater

## Sheet: H. beccarii
Concentration: 0.25 g/l										Concentration: 0.5 g/l										Concentration: 1 g/l										Concentration: 2 g/l
Conditioned water at the left arm					Conditioned water at the right arm					Conditioned water at the left arm					Conditioned water at the right arm					Conditioned water at the left arm					Conditioned water at the right arm					Conditioned water at the left arm					Conditioned water at the right arm
Experimental replicate set 1										Experimental replicate set 1										Experimental replicate set 1										Experimental replicate set 1
Individual	Time (min)	Largest distance (cm)	Displacement (cm)		Individual	Time (min)	Largest distance (cm)	Displacement (cm)		Individual	Time (min)	Largest distance (cm)	Displacement (cm)		Individual	Time (min)	Largest distance (cm)	Displacement (cm)		Individual	Time (min)	Largest distance (cm)	Displacement (cm)		Individual	Time (min)	Largest distance (cm)	Displacement (cm)		Individual	Time (min)	Largest distance (cm)	Displacement (cm)		Individual	Time (min)	Largest distance (cm)	Displacement (cm)
1	23.67	70	70		1	28.89	70	70		1	9.55	55	0		1	27.5	77	75		1	30	77	77		1	4.83	32	3		1	23.67	77	77		1	30	77	70
2	24.89	69	62		2	30	70	63		2	27.47	62	55		2	16.37	46	0		2	30	77	70		2	28.5	55	37		2	20.58	77	70		2	24.5	62	55
3	30	65	25		3	24.67	61	51		3	25.98	48	48		3	15.17	36	30		3	30	72	65		3	29	31	31		3	19.45	77	65		3	10.6	27	2
4	9.32	25	8		4	30	77	77		4	7.97	55	45		4	17.58	22	22		4	27.67	62	62		4	21.28	16	14		4	29.67	54	54		4	19.13	26	19
5	5.08	41	17		5	19.67	77	70		5	26.33	77	77		5	10.83	17	17		5	29.89	70	70		5	20.2	32	32		5	21.87	55	31		5	30	77	77
6	15.32	70	70		6	25.5	77	77		6	30	77	72		6	16.67	39	35		6	6.25	15	10		6	12.67	37	0		6	26.27	77	77		6	30	62	5
7	22.2	52	42		7	19	68	60		7	30	77	35		7	18.5	50	24		7	26.5	50	24		7	30	77	75		7	12.5	77	61		7	17.5	45	36
8	10.5	30	10		8	20.2	70	70		8	30	77	77		8	12.25	5	3		8	30	77	77		8	29.78	62	62		8	16.87	51	47		8	12.34	37	8
9	30	77	77		9	26.5	77	70		9	23.03	50	45		9	16.78	34	0		9	27.25	77	77		9	6.93	22	22		9	19.06	70	46		9	15	71	67
10	30	75	70		10	21.07	25	8		10	22.37	13	13		10	29.8	63	46		10	19.48	77	54		10	12.8	77	73		10	18.3	65	57		10	21.15	46	46
Experimental replicate set 2										Experimental replicate set 2										Experimental replicate set 2										Experimental replicate set 2
1	12.58	30	10		1	27.13	63	63		1	23.38	48	48		1	30	77	65		1	10.67	31	24		1	19.01	56	56		1	11.25	36	36		1	30	60	10
2	11.67	35	17		2	21.5	67	59		2	14.28	50	23		2	26.25	77	71		2	16.75	24	0		2	12.28	17	10		2	19.33	30	26		2	25.1	65	31
3	20.87	72	65		3	18.6	58	58		3	20.03	35	0		3	26.9	49	46		3	23.67	77	77		3	30	77	77		3	19	26	21		3	17.5	61	35
4	15.5	63	50		4	14.25	68	50		4	30	77	61		4	19.5	77	71		4	20.58	77	77		4	30	77	72		4	20.7	71	32		4	25	65	65
5	27.4	77	77		5	16.83	77	77		5	30	77	24		5	23.32	36	34		5	19.45	55	50		5	27.37	65	32		5	18.67	62	31		5	29.89	77	77
6	22.67	40	9		6	20.88	77	77		6	27.98	65	41		6	15.2	32	12		6	29.15	62	23		6	19.78	55	15		6	29.67	18	18		6	13	51	35
7	12.25	19	19		7	26.87	77	66		7	30	77	77		7	13.78	12	5		7	29.67	13	13		7	29.67	77	63		7	12.25	77	77		7	9.34	34	0
8	17.34	77	77		8	19.23	70	62		8	22.25	62	20		8	10.48	55	50		8	24.98	45	45		8	21.87	77	57		8	17.34	77	68		8	14.5	18	18
9	29.78	62	50		9	16.81	55	54		9	30	70	17		9	20.93	77	77		9	20.67	35	30		9	26.27	55	32		9	29.78	65	45		9	17.89	25	20
10	30	77	77		10	20.89	39	31		10	25.08	35	18		10	21.87	65	65		10	15	55	53		10	29	66	66		10	23	35	35		10	28.78	72	72
Experimental replicate set 3										Experimental replicate set 3										Experimental replicate set 3										Experimental replicate set 3
1	17.1	77	77		1	19.45	45	12		1	24.83	52	7		1	7.47	13	4		1	19.2	77	77		1	12.5	55	52		1	12.5	77	66		1	26.87	64	53
2	23.18	69	60		2	23.32	77	72		2	8.67	40	40		2	15.53	20	13		2	30	55	52		2	16.37	77	54		2	23.67	77	65		2	16.45	41	25
3	28.75	66	52		3	10.98	65	63		3	16.53	70	70		3	23.47	44	35		3	16.22	60	44		3	29.67	62	62		3	26.33	51	49		3	22.2	51	45
4	18.62	55	55		4	22.67	55	0		4	26.47	65	55		4	29.67	77	70		4	10.67	25	20		4	4.32	13	3		4	22.58	48	48		4	16.78	22	22
5	26.4	70	68		5	14.5	46	45		5	20.78	21	21		5	24.97	63	40		5	28.5	69	60		5	6.08	23	10		5	22.6	20	14		5	15.45	61	35
6	25.5	77	67		6	11.23	55	26		6	10.67	14	5		6	16.67	48	48		6	14.67	56	33		6	15.58	46	40		6	14.67	77	77		6	23.13	51	42
7	19.6	52	42		7	16.45	67	60		7	15.58	77	63		7	12.5	59	59		7	21.87	77	65		7	27.63	60	55		7	13.5	72	69		7	20.14	35	25
8	20.13	30	12		8	10	32	32		8	4.45	15	15		8	29.67	77	47		8	18.5	26	20		8	18.13	45	45		8	10.98	61	59		8	30	77	77
9	7.89	36	0		9	21.34	31	16		9	23.6	60	40		9	28.27	54	54		9	8.6	19	0		9	16.22	45	0		9	19.8	35	35		9	24.5	66	66
10	5.98	65	0		10	20.32	43	40		10	19.1	26	23		10	9.7	10	0		10	12.5	36	36		10	27	68	66		10	26.8	77	71		10	26.58	53	49
Note:
	Swim toward vegetation cue
	Swim toward control seawater

## Sheet: S. alterniflora
Concentration: 0.25 g/l										Concentration: 0.5 g/l										Concentration: 1 g/l										Concentration: 2 g/l
Conditioned water at the left arm					Conditioned water at the right arm					Conditioned water at the left arm					Conditioned water at the right arm					Conditioned water at the left arm					Conditioned water at the right arm					Conditioned water at the left arm					Conditioned water at the right arm
Experimental replicate set 1										Experimental replicate set 1										Experimental replicate set 1										Experimental replicate set 1
Individual	Time (min)	Largest distance (cm)	Displacement (cm)		Individual	Time (min)	Largest distance (cm)	Displacement (cm)		Individual	Time (min)	Largest distance (cm)	Displacement (cm)		Individual	Time (min)	Largest distance (cm)	Displacement (cm)		Individual	Time (min)	Largest distance (cm)	Displacement (cm)		Individual	Time (min)	Largest distance (cm)	Displacement (cm)		Individual	Time (min)	Largest distance (cm)	Displacement (cm)		Individual	Time (min)	Largest distance (cm)	Displacement (cm)
1	22.45	77	13		1	28.5	77	47		1	18.06	77	65		1	19.75	77	77		1	14.9	64	64		1	28.38	64	60		1	30	65	65		1	14.4	24	17
2	25.57	74	62		2	16.45	70	25		2	7.3	39	39		2	27.34	77	70		2	2.13	10.4	10.4		2	4.15	15	10		2	20.917	33	0		2	19.8	17	6
3	22.85	71	71		3	18.5	77	74		3	28.8	77	70		3	28.9	66	48		3	6.4	9.5	9.5		3	6.87	9	1		3	19.34	36	10		3	30	60	40
4	20.82	30	25		4	27.13	55	49		4	7.89	20	15		4	22.4	77	68		4	21.5	27.3	27.3		4	1.25	7	7		4	22.7	65	65		4	19.75	56	50
5	30	77	77		5	23.5	43	41		5	19.75	55	30		5	19.55	70	45		5	9.16	5.2	5.2		5	9.33	21	21		5	9.917	10	7		5	16	32	0
6	30	77	77		6	15.5	50	24		6	25.98	77	77		6	29.2	70	68		6	6.13	20	16		6	12.45	77	75		6	9.75	15	5		6	24.98	70	67
7	26.83	77	77		7	19.1	20	0		7	30	77	71		7	22.2	55	18		7	18.5	35	24		7	15.57	77	75		7	29.34	15	15		7	20.67	20	12
8	30	77	67		8	22.6	34	14		8	30	69	65		8	15.67	70	70		8	10.88	13	4		8	10.03	41	0		8	28.9	30	5		8	19.2	10	8
9	24.46	70	55		9	14.67	57	57		9	17.67	55	55		9	19.8	65	0		9	8.2	6	6		9	20.65	10	0		9	25.9	70	55		9	30	77	77
10	17.8	15	11		10	13.5	55	52		10	20.5	44	44		10	30	77	71		10	16.3	19	6		10	29.75	60	55		10	13	38	5		10	30	65	65
Experimental replicate set 2										Experimental replicate set 2										Experimental replicate set 2										Experimental replicate set 2
1	11.46	34	12		1	14.28	26	21		1	15.1	77	77		1	30	77	54		1	25.5	77	70		1	22.85	25	17		1	10.67	40	17		1	19	15	15
2	10.83	65	0		2	20.03	20	20		2	18.45	77	26		2	9.83	43	25		2	20.67	20	19		2	0.82	9	1		2	28.5	17	15		2	12.5	55	45
3	21.47	77	66		3	27.4	51	51		3	14.46	29	29		3	30	77	77		3	12.8	16	0		3	14.11	57	1		3	20.7	34	11		3	23.67	44	28
4	20	42	10		4	17.57	44	44		4	28.13	57	46		4	14.28	67	67		4	2.97	19	7		4	12.98	42	2		4	18.67	70	69		4	28.67	65	62
5	26.13	77	36		5	9.08	15	12		5	18.5	77	74		5	20.03	65	40		5	30	77	69		5	11	66	66		5	29.67	55	20		5	30	60	60
6	18.5	26	3		6	18.13	56	56		6	16.45	37	30		6	28.45	77	77		6	11.46	77	66		6	13.75	61	61		6	29.2	70	40		6	14.6	45	45
7	10.88	31	12		7	17.05	50	13		7	7.13	9	3		7	15	56	25		7	25.35	67	67		7	9.08	14.5	0		7	26.2	15	0		7	24.5	65	50
8	19.45	77	77		8	15.58	26	0		8	20.2	77	49		8	22.6	77	70		8	6.45	5	2		8	2.18	8	7		8	25	5	0		8	6.89	20	9
9	29.15	77	77		9	19.58	14	5		9	24.5	46	46		9	14.67	56	32		9	9.92	32	5		9	25.53	77	54		9	23.7	43	43		9	10.34	9	5
10	29.67	70	66		10	13.62	39	39		10	16.75	45	37		10	13.5	35	25		10	8.05	24	24		10	16.65	20	0		10	23.6	77	77		10	27.33	72	70
Experimental replicate set 3										Experimental replicate set 3										Experimental replicate set 3										Experimental replicate set 3
1	30	71	69		1	8.45	71	70		1	16.88	43	43		1	19.75	57	45		1	10.83	12	3		1	4.88	6	6		1	14.67	8	8		1	25.98	12	12
2	30	77	72		2	11.46	77	69		2	14.55	16	10		2	25.98	55	25		2	11.47	77	37		2	20.55	51	30		2	24.6	37	13		2	23.34	77	0
3	14.25	44	25		3	26.33	61	48		3	13.85	35	18		3	23.67	77	70		3	3.97	27	0		3	13.85	21	21		3	24	44	44		3	30	63	45
4	8.45	34	34		4	22.58	50	50		4	21.27	55	14		4	25.98	70	65		4	23.8	67	67		4	21.27	40	32		4	25.92	53	30		4	17.5	44	6
5	25.27	55	40		5	19.06	55	55		5	23.67	45	33		5	23.34	25	20		5	6.72	77	77		5	17.45	27	27		5	22.4	63	44		5	30	77	67
6	19.7	45	40		6	8.3	36	36		6	10.58	14	10		6	17.5	14	5		6	9.77	5	4		6	30	63	36		6	19.55	30	30		6	22.38	61	61
7	9.6	16	10		7	21.87	66	66		7	19.57	77	77		7	6.89	11	11		7	15.68	35	35		7	23.93	70	66		7	29.2	40	0		7	27.89	70	62
8	23.83	51	51		8	29.8	61	61		8	9.45	35	35		8	10.98	20	0		8	14.32	32	32		8	18.02	63	61		8	22.2	38	30		8	26.67	65	59
9	19.46	28	17		9	6.8	24	20		9	20.98	40	7		9	29.89	68	29		9	13.28	16	9		9	25.48	77	73		9	22.6	63	36		9	29.98	60	25
10	30	77	65		10	7.87	26	15		10	17.25	20	3		10	10.33	13	13		10	13.58	13	1		10	30	65	64		10	24.8	77	69		10	30	60	0
Note:
	Swim toward vegetation cue
	Swim toward control seawater
